# Supplementary material for: Non-specific chronic low back pain: differences in spinal kinematics in subgroups during functional tasks
Source: Springer Nature journal article supplement (doi:10.1007/s00586-017-5217-1), 2017-07-21
Supplement: MOESM1 [file 13320880]

## Protocols for Functional Tasks

### Sit-to-Stand-to-Sit

For the sit-to-stand task the plinth height was individually standardised to a height where the subjects' hips and knees were resting comfortably at 90 degrees, measured using a goniometer (Lafayette Instrument Co. Ltd., Lafayette, IN) with the thighs well supported on the plinth. Sit to stand was performed from a usual sitting position. The subject was instructed to sit in their usual (unsupported) sitting position on the plinth, wait for 2 seconds in standing, then return to the original position.

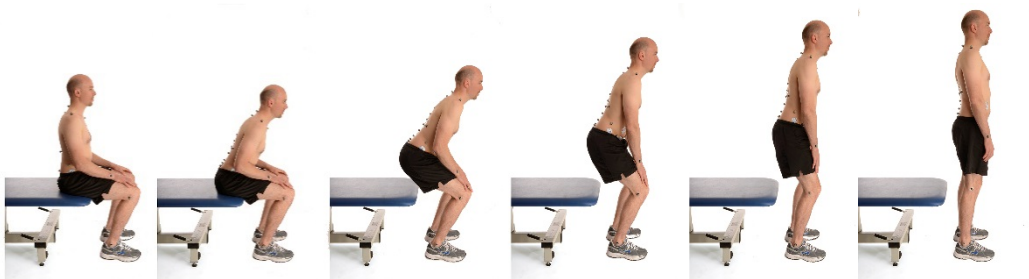

## Box

To measure a standardised distance for moving the box during the rotational box task tape was placed at a distance equal to 70% of the total upper limb (UL) length from the midline of the plinth (NB: total upper limb length was measured in cm from the apex of the acromion process to the distal end of the middle phalanx of each hand). For this task the plinth was also set to the height of the individuals' greater trochanter. To perform the task a 2.5kg box was placed over the marked line to the left hand side of the plinth. The subject was instructed to stand with the plinth in front and move the box from left to right (to a position over the line to the right hand side) with the box starting and finishing facing the same direction. No specific directions regarding how to lift were given, however the subject was instructed to stand in a comfortable position and keep their feet stationary throughout the task. At the end of the task the subject returned to their usual standing position.

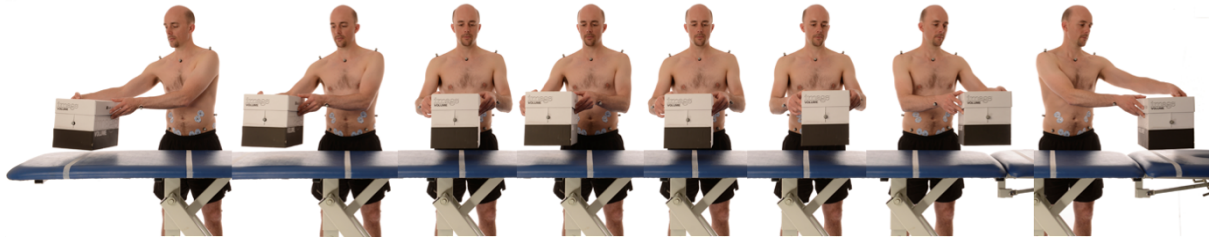

## Reaching

The shelf used in the reaching task was set to the height of the ulna styloid process (right upper limb) when the shoulder was in full flexion (fully elevated). The subject stood directly in front of the custom-made shelf, with the shelf base in-line with the midline of the trunk (frontal plane). The subject placed a jar onto the shelf using their right hand, allowed the jar to rest on the shelf for 2 seconds (without releasing from their hand) and returned the jar to the original position. Feet were kept stationary throughout and the subject was instructed to keep their heels on the floor at all times. The subject also kept hold of the jar at all times throughout the task.

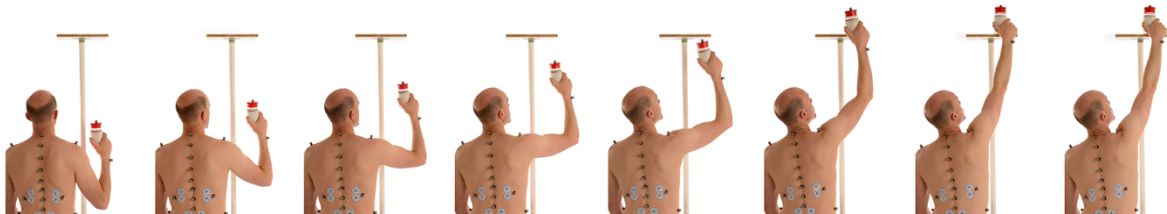

### Stepping up and down

Subjects were instructed to stand in front of a 6-inch Reebok® step (Adidas International Trading, Amsterdam, Netherlands), step onto the step (with a self-selected leading-leg), wait in double-stance on top of the step for 2 seconds, and then step down (with a self-selected leading-leg). The subject was instructed that the self-selected leading-leg must remain consistent throughout trials. To ensure data could be analysed effectively in MATLAB the subject was required to wait in their usual standing position following the step down for 2 seconds to enable the end task position to be defined.

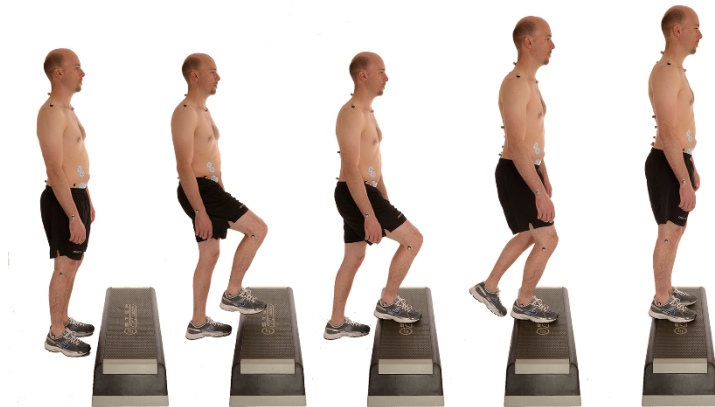

### Bending to pick up a pen (and return)

Subjects stood in their usual standing position with a pen (with a marker attached) placed at a point 40cm in front of them on the floor. Subjects were instructed to pick up the pen from the floor and return to their usual standing position. Subjects were encouraged to pick up the pen in whichever way they felt was most natural, however they were instructed to keep their feet stationary throughout the task. Subjects were asked to pick up the pen with their right hand to standardise the movement between subjects.

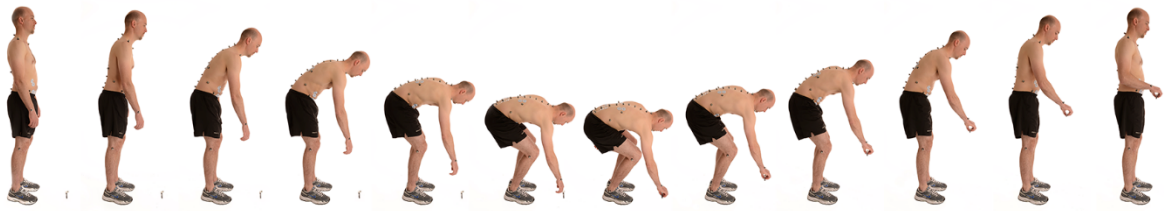

## Data Processing of Functional Tasks

The five activities outlined previously (sit-to-stand-to-sit, box lift rotate and replace, bend to pick up pen, step up and down and reaching) were sub-divided into 9 separate tasks in MATLAB as outlined in the table below:

|                               |                                          |
|-------------------------------|------------------------------------------|
| Sit-to-stand-to-sit           | Sit-to-Stand                             |
|                               | Stand-to-Sit                             |
| Box lift, rotate and replace* | Box Lift                                 |
|                               | Box Replace                              |
| Bend to pick up pen           | Pen Pick Up (Bend Down)                  |
|                               | Pen Pick Up (Return)                     |
| Step up and down              | Step Up                                  |
|                               | Step Down                                |
| Reaching                      | Reach Up                                 |
|                               | Reach Down<br>(Not included in analysis) |

\*NB: only the lifting and replacing components of the task were analysed in the current study.
